# Supplementary material for: Yeast aconitase mitochondrial import is modulated by interactions of its C and N terminal domains and Ssa1/2 (Hsp70)
Source: PubMed Central journal article supplement (PMC5897410; doi:10.1038/s41598-018-24068-w), 2018-04-12

## **Yeast aconitase mitochondrial import is modulated by interactions of its C and N terminal domains and Ssa1/2 (Hsp70).**

Reut Ben-menachem<sup>1</sup>, Katherine wang<sup>2</sup>, Orly Marcu<sup>1</sup>, Zhang Yu<sup>2</sup>, Teck Kwang Lim<sup>3</sup>, Qingsong Lin<sup>3</sup>, Ora Schueler-Furman<sup>1</sup> and Ophry Pines<sup>1, 2</sup>

<sup>1</sup>-Department of Microbiology and Molecular Genetics, IMRIC, Faculty of Medicine, Hebrew University, Jerusalem, Israel.

<sup>2</sup>-CREATE-NUS-HUJ Program and the Department of Microbiology, Yong Loo Lin School of Medicine, National University of Singapore, Singapore.

<sup>3</sup>-Department of Biological Sciences, National University of Singapore.

**Figure 1B -Ben Menachem**

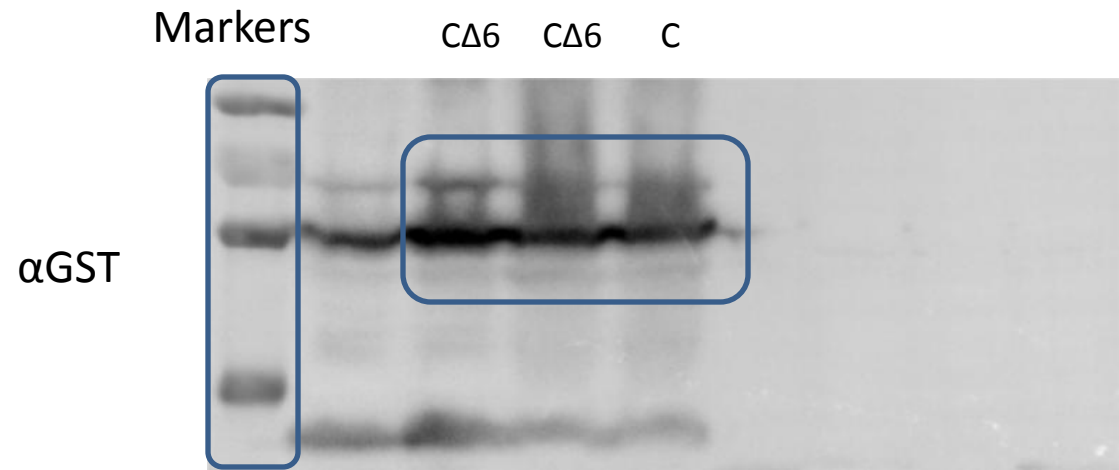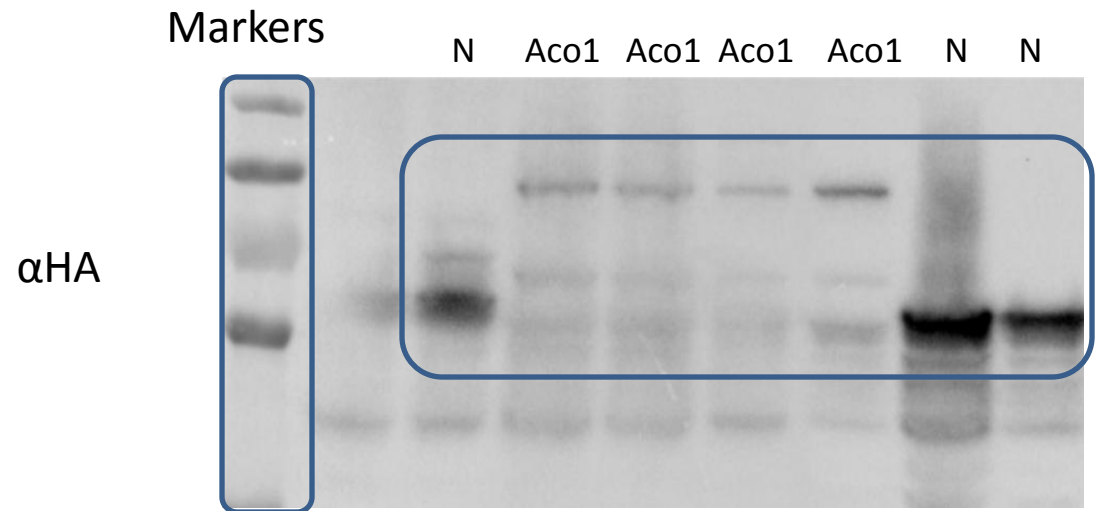

**Figure 1C-Ben Menachem**

Markers

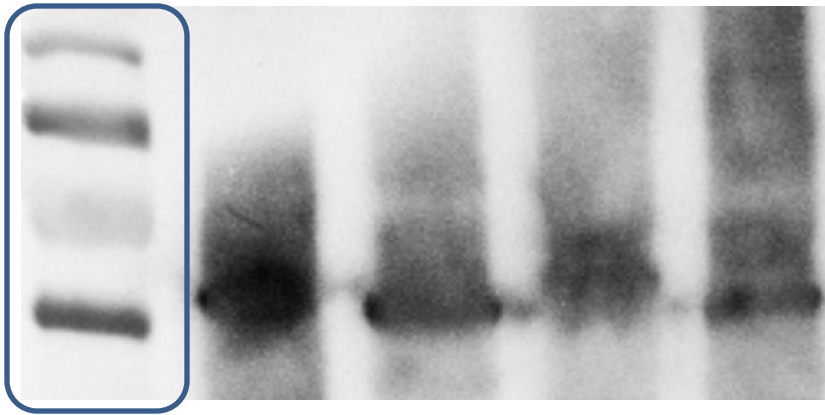

GST-C+ GST-C+ GST-CΔ6+ GST-CΔ6+  
HA-N HA-Aco1 HA-N HA-Aco1

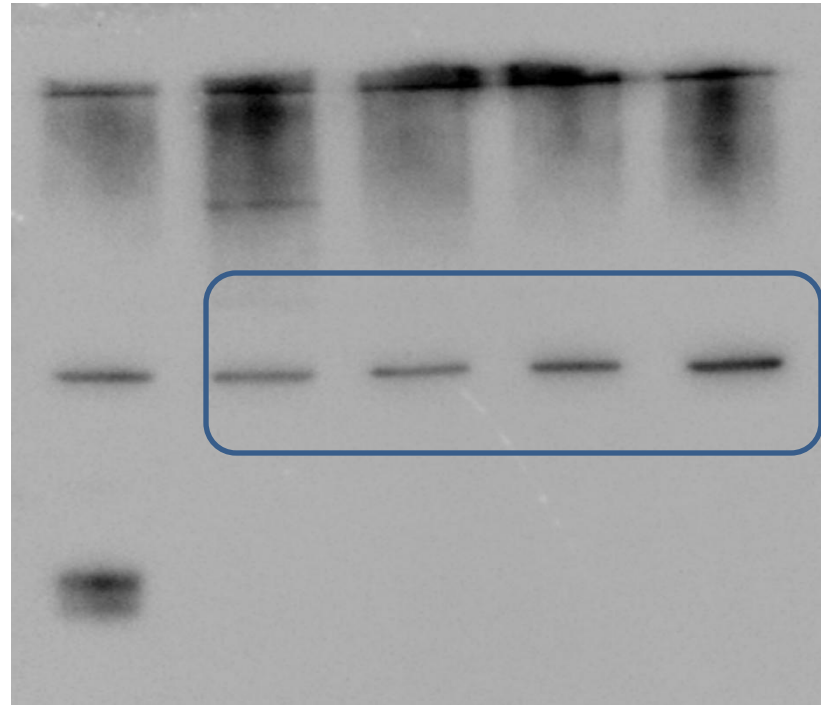

## Figure 2B-Ben Menachem

BY4741+ Aco1-C- $\alpha$

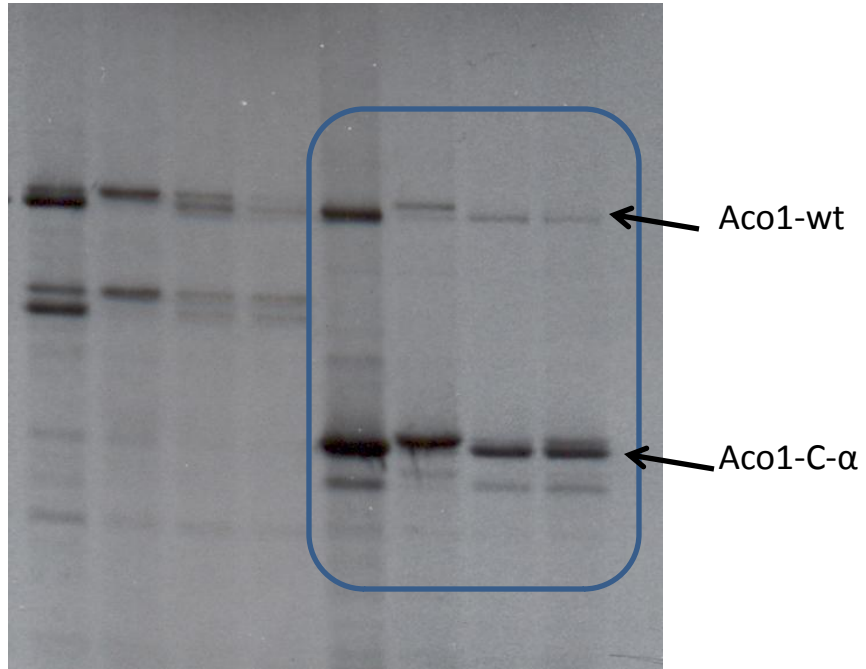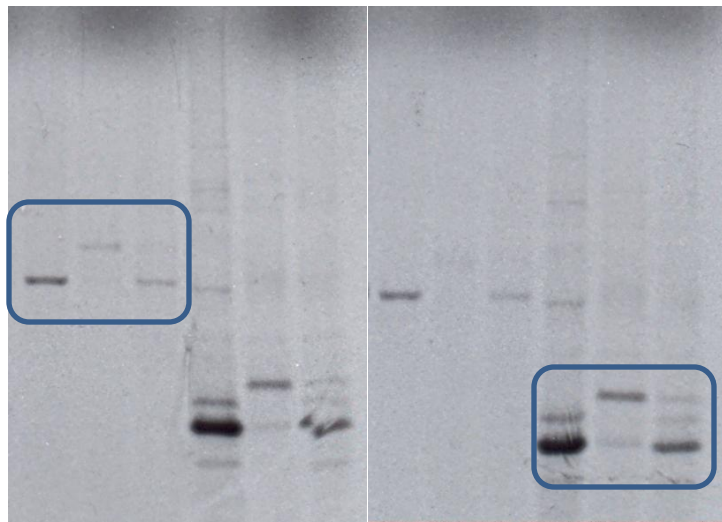

Nfs1

Mdh1

BY4741+ Aco1-N- $\alpha$

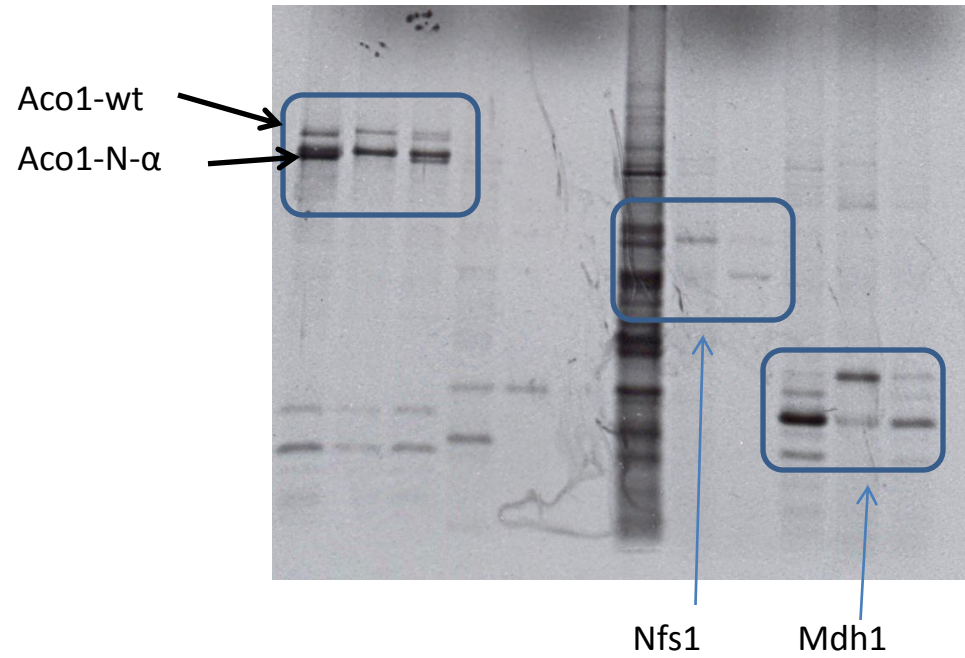

**Figure 3C-Ben Menachem**

pAco1 $\Delta$ 6- $\alpha$       pAco1-775Dtol- $\alpha$       pAco1-Double- $\alpha$

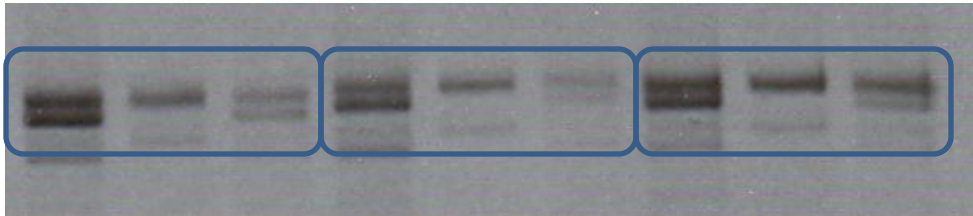

Aco1-WT

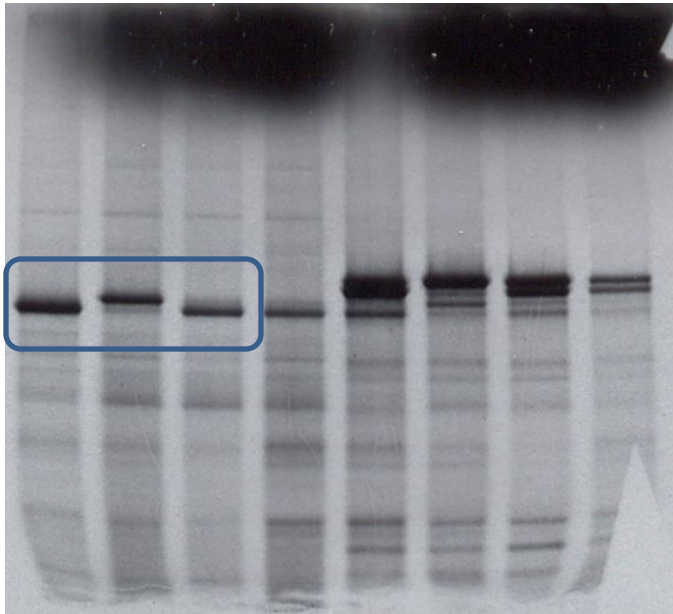

pAco1-216Rtol- $\alpha$

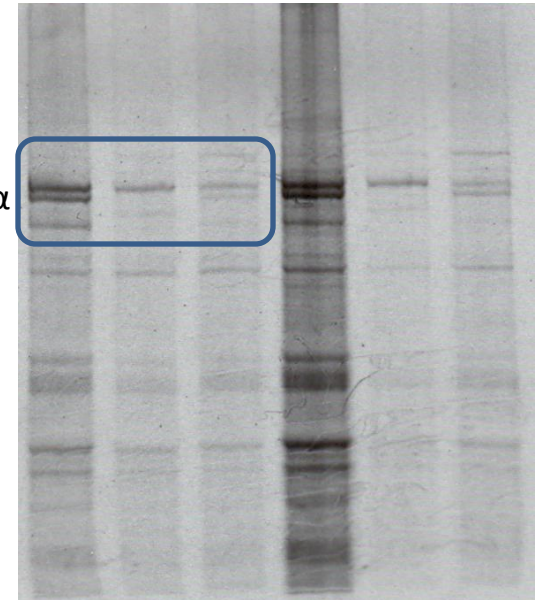

**Figure 5F-Ben Menachem**

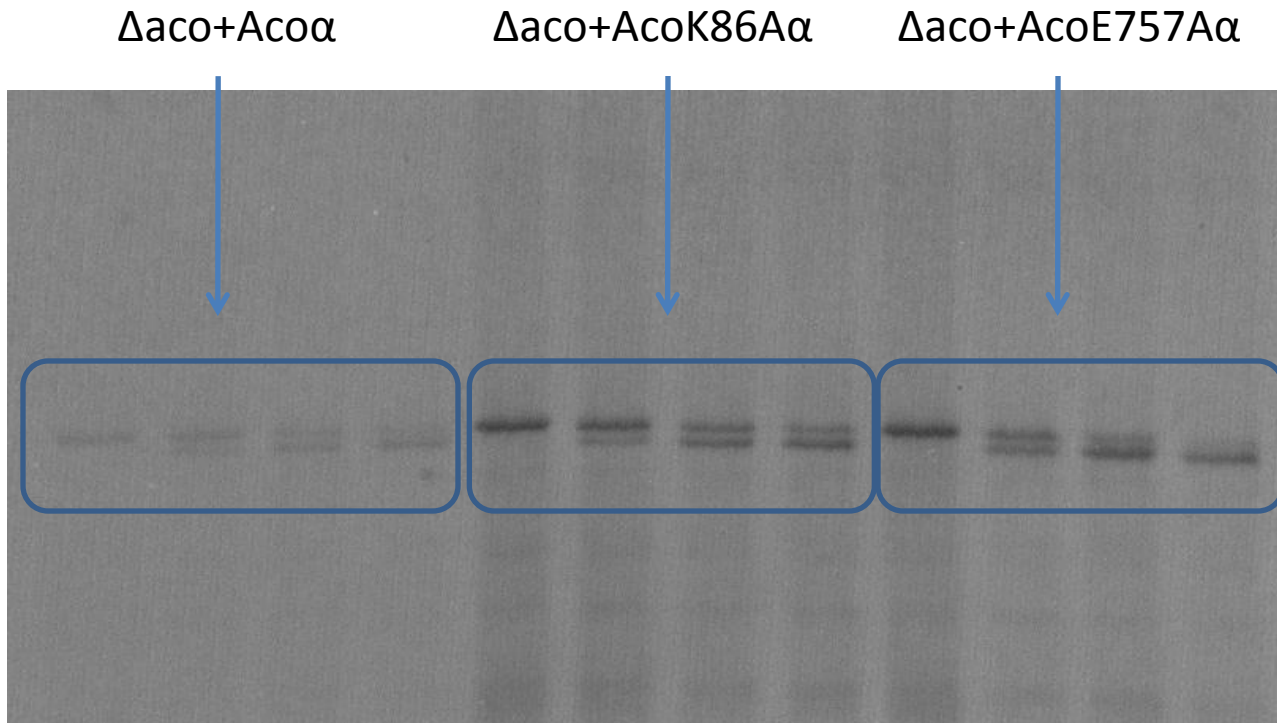

**Figure 6C-Ben Menachem**

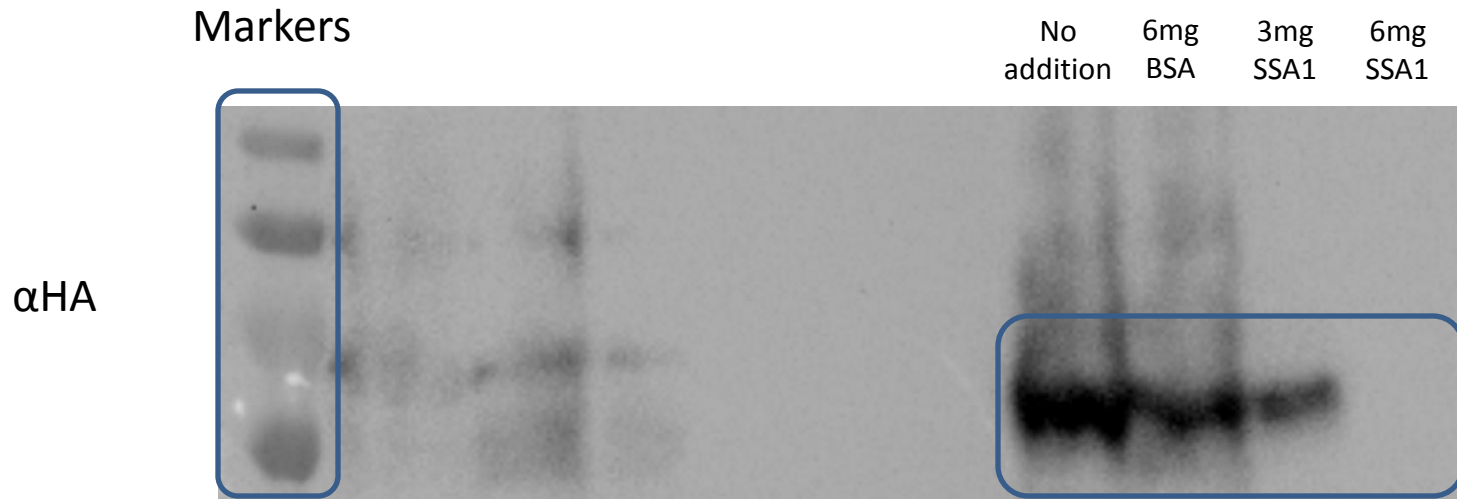

Supplement: 41598_2018_24068_MOESM1_ESM.pdf [file 41598_2018_24068_MOESM1_ESM.pdf]
